# Supplementary material for: High-precision 14C and 40Ar/39Ar dating of the Campanian Ignimbrite (Y-5) reconciles the time-scales of climatic-cultural processes at 40 ka
Source: PubMed Central journal article supplement (PMC5382912; doi:10.1038/srep45940), 2017-04-06
Supplement: srep45940-s1.pdf [file srep45940-s1.pdf]

## High-precision $^{14}\text{C}$ and $^{40}\text{Ar}/^{39}\text{Ar}$ dating of the Campanian Ignimbrite (Y-5) reconciles the time-scales of climatic-cultural processes at 40 ka

Biagio Giaccio<sup>1\*</sup>, Irka Hajdas<sup>2</sup>, Roberto Isaia<sup>3</sup>, Alan Deino<sup>4</sup>, Sebastien Nomade<sup>5</sup>

<sup>1</sup> CNR - Istituto di Geologia Ambientale e Geoingegneria (IGAG), Via Salaria km 29.300, 00015 Monterotondo, Rome, Italy.

<sup>2</sup> Laboratory of Ion Beam Physics, ETH, Otto-Stern-Weg 5, 8093 Zürich, Switzerland.

<sup>3</sup> Istituto Nazionale di Geofisica e Vulcanologia (INGV), Sezione di Napoli, Osservatorio Vesuviano, Via Diocleziano 328, 80124 Naples, Italy.

<sup>4</sup> Berkeley Geochronology Center, 2455 Ridge Road, Berkeley, California 94709, USA.

<sup>5</sup> Laboratoire des Sciences du Climat et de L'Environnement (IPSL-CEA-CNRS-UVSQ) et Université de Paris-Saclay, Domaine du CNRS Bât. 12, Avenue de la Terrasse, 91198 Gif sur Yvette, France.

\*Corresponding author: [biagio.giaccio@cnr.it](mailto:biagio.giaccio@cnr.it)

### Supplementary Figures

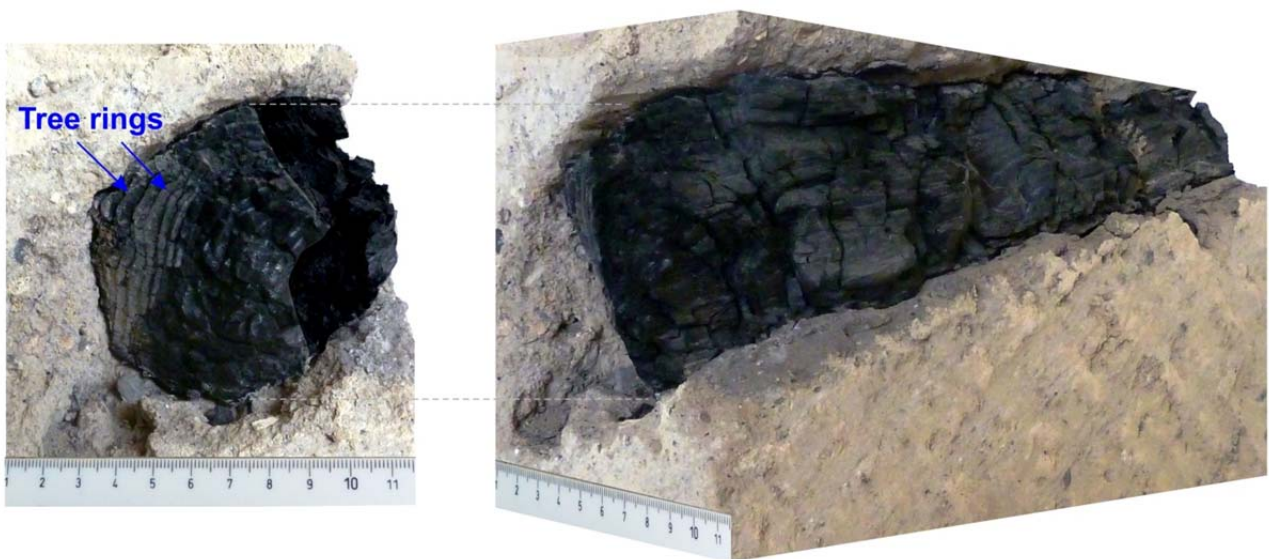

Figure S1. Aspect of the charred wood embedded in Campanian Ignimbrite Yellow Tuff facies.

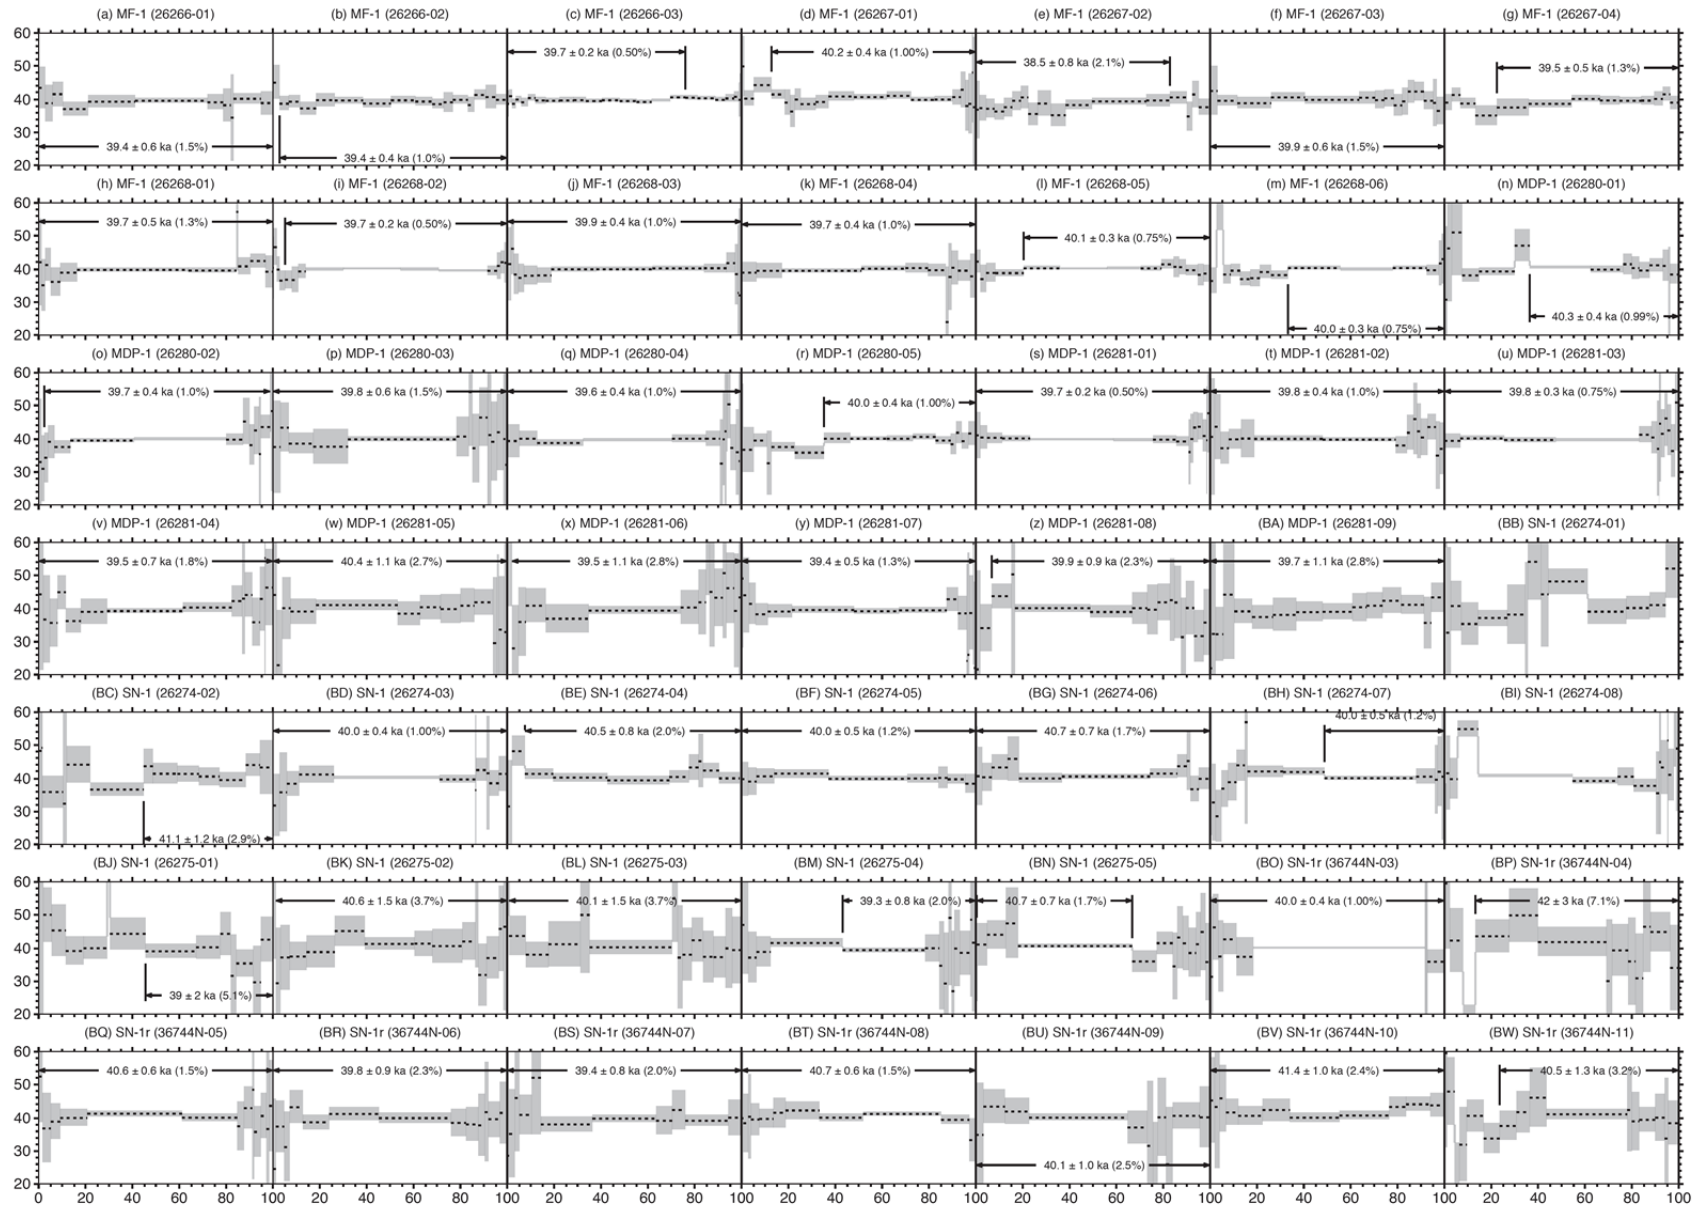

Figure S2. Incremental heating spectra for the sanidine single-crystal  $^{40}\text{Ar}/^{39}\text{Ar}$  experiments.

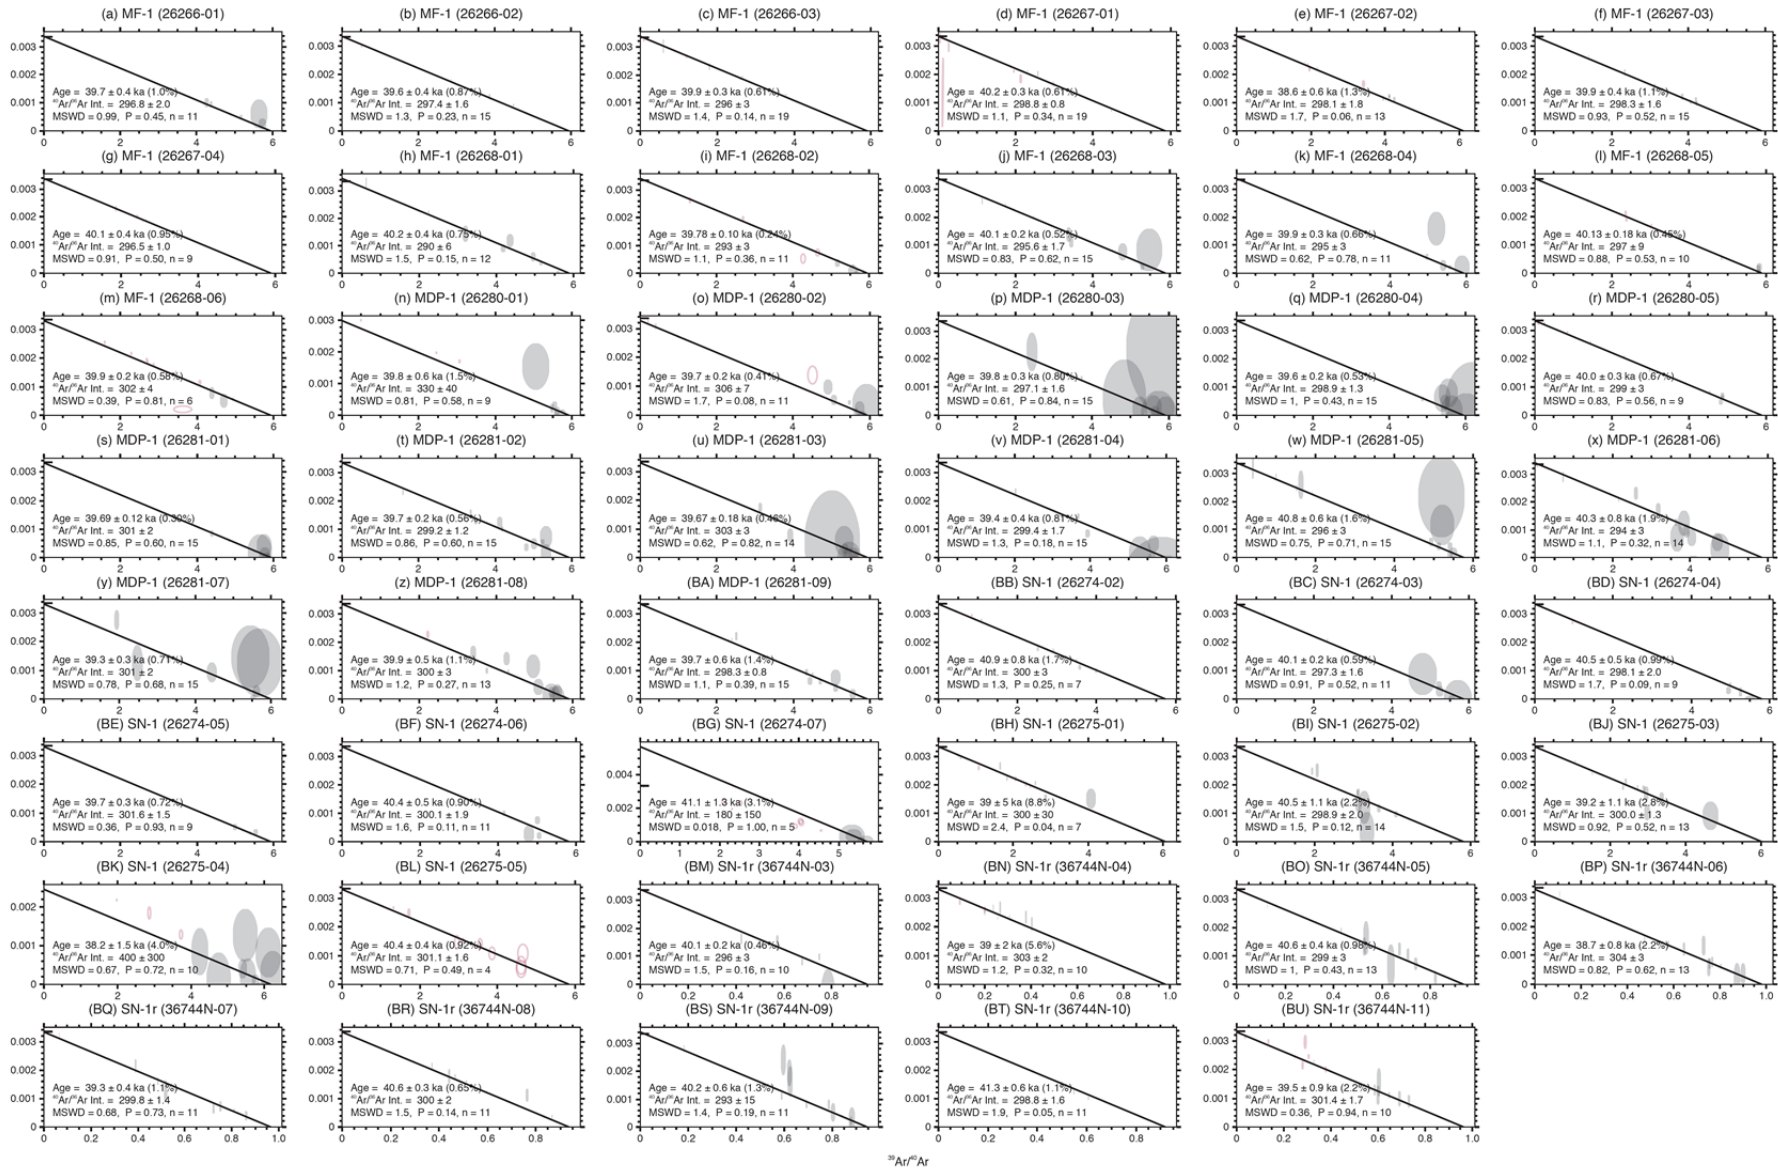

Figure S3. 'Inverse isochron' plots of plateau steps (each step-heating experiment plotted separately). The ages derived from the individual crystal isochrons are carried forward to the final age evaluation.

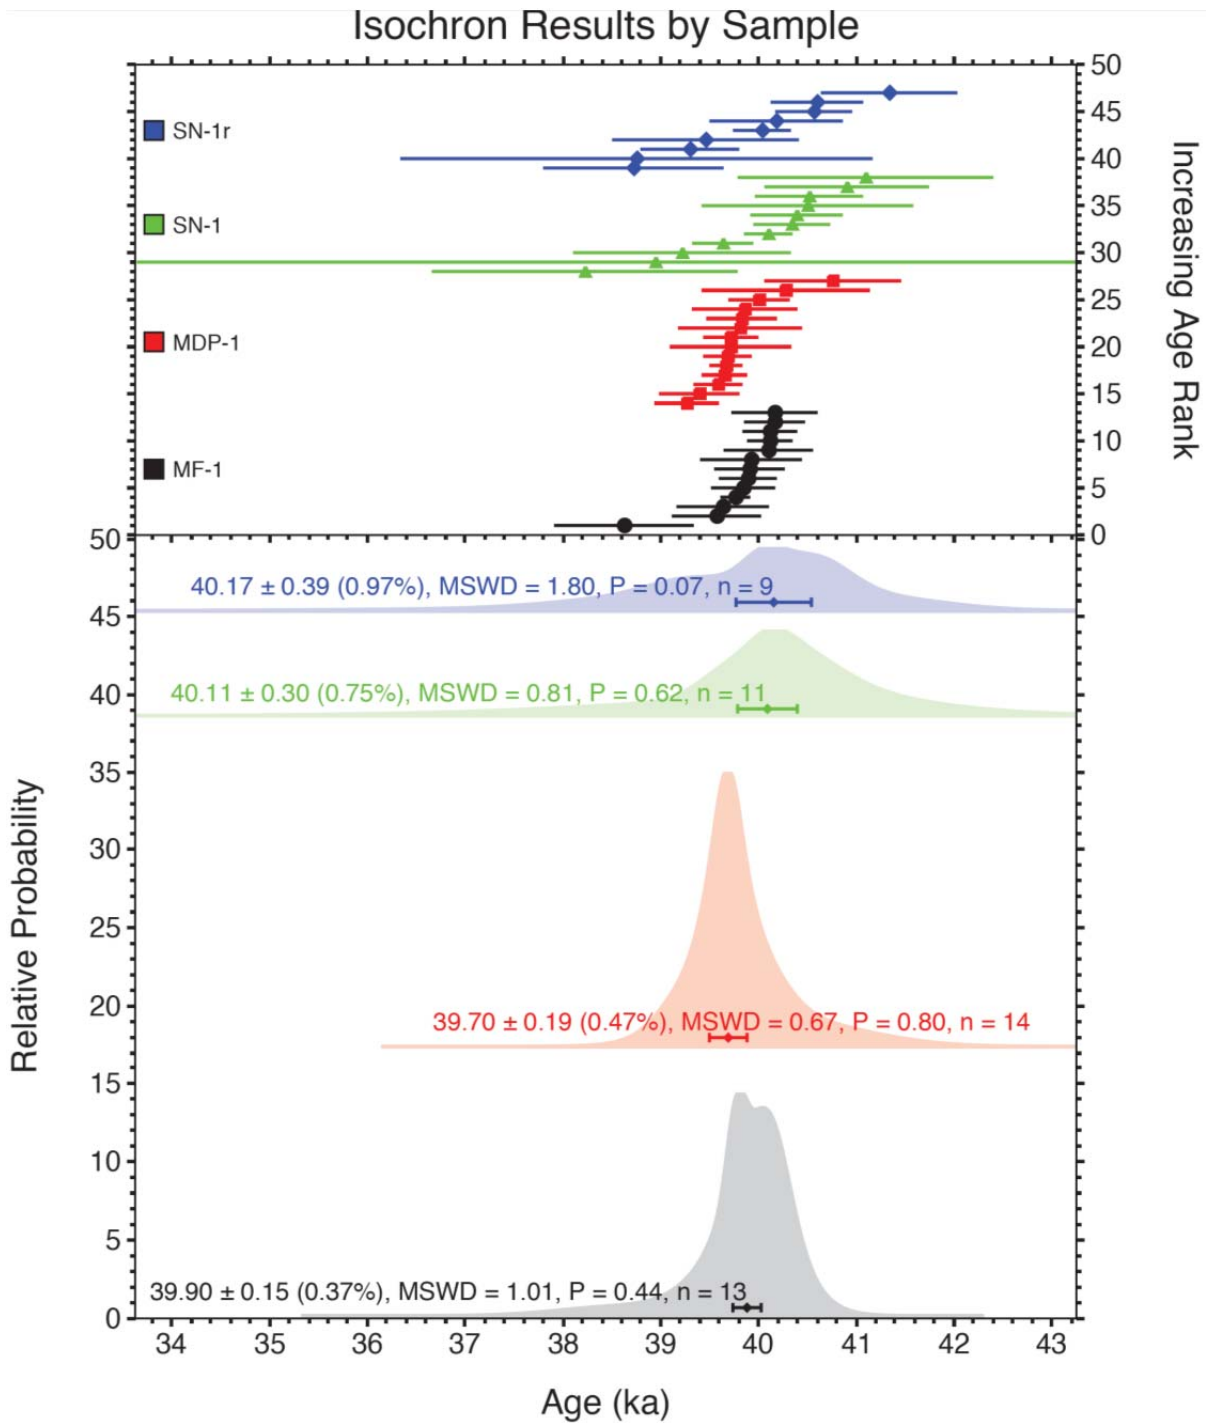

Figure S4. Age-probability density spectra of the isochron ages (Figure S2) and weighted-mean ages of the individual samples. Uncertainties in the individual isochron ages are shown at  $1\sigma$ , whereas the uncertainties in the weighted means are expressed as the standard error, expanded by  $\sqrt{\text{MSWD}}$  where  $\text{MSWD} > 1$ . It can be seen from the uncertainties of the individual analyses that SN-1 and SN-1r  $^{40}\text{Ar}/^{39}\text{Ar}$  experiments give greater uncertainty on average than MF-1 and MDP-1 principally because SN-1 yields a lower percentage of radiogenic  $^{40}\text{Ar}$  ( $\%^{40}\text{Ar}^*$ ) relative to total  $^{40}\text{Ar}$ , hence require a greater atmospheric argon contamination correction. Additionally, SN-1r grains were smaller, about one-tenth the volume of the other three comparably sized samples. Whereas SN-1r required less correction for atmospheric argon contamination relative to SN-1, the smaller grain size resulted in less favourable spectrometer counting statistics, leading to similar mean age uncertainties.
